# Supplementary material for: Device-Based Solutions to Improve Cardiac Physiology and Hemodynamics in Heart Failure With Preserved Ejection Fraction
Source: PubMed Central journal article supplement — JACC Basic Transl Sci. 2021 Aug 4;6(9-10):772–95. doi: 10.1016/j.jacbts.2021.06.002 (PMC8559325; doi:10.1016/j.jacbts.2021.06.002), 2021-08-04
Supplement: mmc1.pdf [file mmc1.pdf]

**Supplemental Table 1: Devices Under Investigation for the Treatment of HFpEF and Clinical Trials**

| Device category | Physiological target | Study Type                     | Primary Endpoints                                                                                                                                                                                                                                  | RCT identifier | RCT status         | Reference |
|-----------------|----------------------|--------------------------------|----------------------------------------------------------------------------------------------------------------------------------------------------------------------------------------------------------------------------------------------------|----------------|--------------------|-----------|
| Atrial shunts   | Elevated LA pressure | Interventional, Est. Size: 150 | Incidence of and time-to cardiovascular mortality or first non-fatal, ischemic stroke (12 months)<br>-Total rate per patient year of HF admissions (~24 months)<br>-Improvement in baseline KCCQ score (12 months)                                 | NCT04632160    | Not yet recruiting | 88-97     |
|                 |                      | Observational, Est. Size: 100  | -Device serious adverse events (30 days)<br>-Improvement in KCCQ score, NYHA classification and EQ5D score (12 months)                                                                                                                             | NCT03191656    | Recruiting         |           |
|                 |                      | Interventional, Est. Size: 608 | -Incidence of and time-to cardiovascular mortality or first non-fatal, ischemic stroke (12 months)<br>-Total rate per patient year of HF admissions (~24 months)<br>-Improvement in baseline KCCQ score (12 months)                                | NCT03088033    | Recruiting         |           |
|                 |                      | Interventional, Act. Size: 44  | -Peri-procedural and post implant serious adverse events such as cardiovascular death or event, embolic stroke, kidney dysfunction (1 month)<br>-Change in PCWP in supine exercise (1 month)                                                       | NCT02600234    | Active             |           |
|                 |                      | Interventional, Act. Size: 64  | -Major adverse cardiac and cerebrovascular events (6 months)                                                                                                                                                                                       | NCT01913613    | Completed          |           |
|                 |                      | Interventional, Act. Size: 11  | -Device serious adverse events (30 days)                                                                                                                                                                                                           | NCT01570517    | Completed          |           |
|                 |                      | Interventional, Est. Size: 20  | -Device and non-device associated major adverse cardiac and neurological events (6 months)<br>-Percentage of patients successfully implanted with study device (3 months)<br>-Percentage of patients implanted with right to left interatrial flow | NCT03838445    | Recruiting         | 102-106   |
|                 |                      | Interventional, Est. Size: 500 | -Device associated major adverse cardiac and neurological events (30 days)<br>-Hierarchical composite of death, heart transplant or LVAD implantation, HF hospitalizations, and change in 6MWT                                                     | NCT03499236    | Recruiting         |           |

|              |                               |                                |                                                                                                                                                                                                                                                                   |             |                    |                 |
|--------------|-------------------------------|--------------------------------|-------------------------------------------------------------------------------------------------------------------------------------------------------------------------------------------------------------------------------------------------------------------|-------------|--------------------|-----------------|
|              |                               | Interventional, Act. Size: 16  | -Device associated major adverse cardiac and neurological events (3 months)                                                                                                                                                                                       | NCT01965015 | Completed          |                 |
|              |                               | Interventional, Est. Size: 230 | -Change in 6MWT (12 months)                                                                                                                                                                                                                                       | NCT03751748 | Not yet recruiting | 111-115         |
|              |                               | Observational, Est. Size: 100  | - Device serious adverse events (12 months)                                                                                                                                                                                                                       | NCT04405583 | Recruiting         |                 |
|              |                               | Interventional, Est. Size: 30  | - Incidence of Serious Adverse Device Effects (~3 months)                                                                                                                                                                                                         | NCT03030274 | Recruiting         |                 |
|              |                               | Interventional, Est. Size: 30  | - Incidence of Serious Adverse Device Effects (~3 months)                                                                                                                                                                                                         | NCT03022851 | Recruiting         |                 |
|              |                               | Interventional, Est. Size: 40  | - Incidence of device associated major adverse cardiac, cerebrovascular, or renal events (30 days)                                                                                                                                                                | NCT03523416 | Recruiting         | 116,117         |
| LV expanders | Diminished LV compliance      | Interventional, Act. Size: 19  | - Number of any adverse cardiac event (36 months)                                                                                                                                                                                                                 | NCT01347125 | Terminated         | 120,121         |
|              |                               | Interventional, Est. Size: 10  | - Number of participants with all-cause mortality and serious adverse events (6 months)<br>- Incidence of successful implant surgical procedure (~24 hours)                                                                                                       | NCT02499601 | Recruiting         | 122-124         |
| Stimulators  | Low baroreflex sensitivity    | Observational, Est. Size: 70   | -Changes in office cuff systolic blood pressure (6 months)                                                                                                                                                                                                        | NCT02876042 | Recruiting         | 130             |
|              | Diminished diastolic function | Interventional, Est. Size: 60  | - Change in KCCQ score (24 weeks)                                                                                                                                                                                                                                 | NCT03240237 | Recruiting         | 145             |
|              | Mechanical desynchrony        | Interventional, Est. Size: 10  | - Change in diastolic reserve index (after 12 weeks of rate responsive pacing and again after 12 weeks of biventricular pacing)<br>- Change in systolic reserve index (after 12 weeks of rate responsive pacing and again after 12 weeks of biventricular pacing) | NCT03338374 | Recruiting         | 158,160-164,172 |
|              |                               | Interventional, Est. Size: 20  | - Change in MLHFQ score (~5 months)<br>- Percent change in NTproBNP (~5 months)                                                                                                                                                                                   | NCT04546555 | Recruiting         |                 |
|              |                               | Interventional, Est. Size: 30  | - Oxygen consumption at ventilatory anaerobic threshold (~4 weeks)                                                                                                                                                                                                | NCT02145351 | Recruiting         |                 |
|              |                               | Interventional, Act. Size: 22  | -Number of adverse events while the Fusion Pacing download is active vs. inactive (~8 months)<br>-Percentage of time the Fusion Pacing is active throughout a four-month follow-up period                                                                         | NCT01045291 | Completed          |                 |

|     |                           |                                                                                                                                        |     |             |           |                                      |
|-----|---------------------------|----------------------------------------------------------------------------------------------------------------------------------------|-----|-------------|-----------|--------------------------------------|
|     |                           | Interventional                                                                                                                         | N/R | NCT01618981 | Completed |                                      |
| MCS | Diminished cardiac output | -Clinical studies for the MCS devices mentioned are yet to be conducted” and have that centred across the columns and rows potentially |     |             |           | 23<br>176,177<br>178-182<br>87<br>87 |

Reference numbers refer to the reference numbers in the main article.

6MWT= 6-minute walk test;

EQ5D = EuroQol five dimensional;

KCCQ= Kansas City Cardiomyopathy Questionnaire;

LVAD= Left ventricular assist device;

MLHFQ= Minnesota Living with Heart Failure Questionnaire;

NTproBNP= N-terminal pro-brain natriuretic peptide;

PCWP= Pulmonary capillary wedge pressure;

N/R= Not Reported
